# Supplementary material for: Genome-Wide Identification of the Genes of the Odorant-Binding Protein Family Reveal Their Role in the Olfactory Response of the Tomato Leaf Miner (Tuta absoluta) to a Repellent Plant
Source: MDPI journal article supplement (doi:10.3390/agronomy14010231), 2024-01-22
Supplement: s1 [file s1]

## **Supporting Information for**

**Genome-Wide Identification of the Genes of the Odorant-Binding Protein Family  
Reveal Their Role in the Olfactory Response of the Tomato Leaf Miner (*Tuta  
absoluta*) to a Repellent Plant**

**Table S1. The sequence IDs for each OBP used for phylogenetic analysis.**

| <b>Gene Name</b> | <b>Database</b> | <b>Species</b>                 |
|------------------|-----------------|--------------------------------|
| BAH36761.1       | NCBI Protein    | <i>Bombyx mori</i>             |
| BAH79159.1       | NCBI Protein    | <i>Bombyx mori</i>             |
| BAH79158.1       | NCBI Protein    | <i>Bombyx mori</i>             |
| BAH36763.1       | NCBI Protein    | <i>Bombyx mori</i>             |
| BAH36762.1       | NCBI Protein    | <i>Bombyx mori</i>             |
| BAH36760.1       | NCBI Protein    | <i>Bombyx mori</i>             |
| BAI22690.1       | NCBI Protein    | <i>Bombyx mori</i>             |
| BAI22689.1       | NCBI Protein    | <i>Bombyx mori</i>             |
| NP_001140189.1   | NCBI Protein    | <i>Bombyx mori</i>             |
| NP_001140187.1   | NCBI Protein    | <i>Bombyx mori</i>             |
| NP_001140186.1   | NCBI Protein    | <i>Bombyx mori</i>             |
| NP_001140190.1   | NCBI Protein    | <i>Bombyx mori</i>             |
| NP_001037496.1   | NCBI Protein    | <i>Bombyx mori</i>             |
| XP_012547441.1   | NCBI Protein    | <i>Bombyx mori</i>             |
| XP_037868365.1   | NCBI Protein    | <i>Bombyx mori</i>             |
| XP_037867017.1   | NCBI Protein    | <i>Bombyx mori</i>             |
| XP_037873054.1   | NCBI Protein    | <i>Bombyx mori</i>             |
| XP_004928236.2   | NCBI Protein    | <i>Bombyx mori</i>             |
| XP_004932340.1   | NCBI Protein    | <i>Bombyx mori</i>             |
| XP_004931990.1   | NCBI Protein    | <i>Bombyx mori</i>             |
| Obp83a           | Flybase         | <i>Drosophila melanogaster</i> |
| Obp19d           | Flybase         | <i>Drosophila melanogaster</i> |
| Obp56c           | Flybase         | <i>Drosophila melanogaster</i> |
| Obp44a           | Flybase         | <i>Drosophila melanogaster</i> |
| Obp19c           | Flybase         | <i>Drosophila melanogaster</i> |
| Obp28a           | Flybase         | <i>Drosophila melanogaster</i> |
| Obp73a           | Flybase         | <i>Drosophila melanogaster</i> |
| Obp56i           | Flybase         | <i>Drosophila melanogaster</i> |
| Obp47b           | Flybase         | <i>Drosophila melanogaster</i> |
| Obp56f           | Flybase         | <i>Drosophila melanogaster</i> |
| Obp56b           | Flybase         | <i>Drosophila melanogaster</i> |
| Obp59a           | Flybase         | <i>Drosophila melanogaster</i> |
| Obp46a           | Flybase         | <i>Drosophila melanogaster</i> |
| Obp83b           | Flybase         | <i>Drosophila melanogaster</i> |
| Obp85a           | Flybase         | <i>Drosophila melanogaster</i> |
| Obp19b           | Flybase         | <i>Drosophila melanogaster</i> |
| Obp56g           | Flybase         | <i>Drosophila melanogaster</i> |
| Obp58d           | Flybase         | <i>Drosophila melanogaster</i> |
| Obp99b           | Flybase         | <i>Drosophila melanogaster</i> |
| Obp83g           | Flybase         | <i>Drosophila melanogaster</i> |
| Obp57a           | Flybase         | <i>Drosophila melanogaster</i> |
| Obp18a           | Flybase         | <i>Drosophila melanogaster</i> |

|                |              |                                |
|----------------|--------------|--------------------------------|
| Obp56d         | Flybase      | <i>Drosophila melanogaster</i> |
| Obp49a         | Flybase      | <i>Drosophila melanogaster</i> |
| Obp99a         | Flybase      | <i>Drosophila melanogaster</i> |
| Obp8a          | Flybase      | <i>Drosophila melanogaster</i> |
| Obp57b         | Flybase      | <i>Drosophila melanogaster</i> |
| Obp57c         | Flybase      | <i>Drosophila melanogaster</i> |
| Obp50a         | Flybase      | <i>Drosophila melanogaster</i> |
| Obp93a         | Flybase      | <i>Drosophila melanogaster</i> |
| Obp56a         | Flybase      | <i>Drosophila melanogaster</i> |
| Obp99d         | Flybase      | <i>Drosophila melanogaster</i> |
| Obp50d         | Flybase      | <i>Drosophila melanogaster</i> |
| Obp58b         | Flybase      | <i>Drosophila melanogaster</i> |
| Obp50e         | Flybase      | <i>Drosophila melanogaster</i> |
| Obp83ef        | Flybase      | <i>Drosophila melanogaster</i> |
| Obp57e         | Flybase      | <i>Drosophila melanogaster</i> |
| Obp56h         | Flybase      | <i>Drosophila melanogaster</i> |
| Obp56e         | Flybase      | <i>Drosophila melanogaster</i> |
| Obp99c         | Flybase      | <i>Drosophila melanogaster</i> |
| Obp83cd        | Flybase      | <i>Drosophila melanogaster</i> |
| Obp57d         | Flybase      | <i>Drosophila melanogaster</i> |
| Obp19a         | Flybase      | <i>Drosophila melanogaster</i> |
| Obp84a         | Flybase      | <i>Drosophila melanogaster</i> |
| Obp47a         | Flybase      | <i>Drosophila melanogaster</i> |
| Obp69a         | Flybase      | <i>Drosophila melanogaster</i> |
| Obp51a         | Flybase      | <i>Drosophila melanogaster</i> |
| Obp50c         | Flybase      | <i>Drosophila melanogaster</i> |
| Obp50b         | Flybase      | <i>Drosophila melanogaster</i> |
| Obp22a         | Flybase      | <i>Drosophila melanogaster</i> |
| Obp58c         | Flybase      | <i>Drosophila melanogaster</i> |
| AEX07279.1     | NCBI Protein | <i>Helicoverpa armigera</i>    |
| AEX07278.1     | NCBI Protein | <i>Helicoverpa armigera</i>    |
| XP_021200198.2 | NCBI Protein | <i>Helicoverpa armigera</i>    |
| AEJ90553.1     | NCBI Protein | <i>Helicoverpa armigera</i>    |
| AFI57167.1     | NCBI Protein | <i>Helicoverpa armigera</i>    |
| AFI57166.1     | NCBI Protein | <i>Helicoverpa armigera</i>    |
| AFI57165.1     | NCBI Protein | <i>Helicoverpa armigera</i>    |
| XP_021192649.2 | NCBI Protein | <i>Helicoverpa armigera</i>    |
| XP_021192652.2 | NCBI Protein | <i>Helicoverpa armigera</i>    |
| XP_021192665.2 | NCBI Protein | <i>Helicoverpa armigera</i>    |
| XP_049700695.1 | NCBI Protein | <i>Helicoverpa armigera</i>    |
| XP_049700409.1 | NCBI Protein | <i>Helicoverpa armigera</i>    |
| XP_049700407.1 | NCBI Protein | <i>Helicoverpa armigera</i>    |
| XP_021193809.2 | NCBI Protein | <i>Helicoverpa armigera</i>    |
| XP_049700401.1 | NCBI Protein | <i>Helicoverpa armigera</i>    |

|                |              |                              |
|----------------|--------------|------------------------------|
| XP_021188671.1 | NCBI Protein | <i>Helicoverpa armigera</i>  |
| XP_021187376.1 | NCBI Protein | <i>Helicoverpa armigera</i>  |
| ASA40067.1     | NCBI Protein | <i>Helicoverpa armigera</i>  |
| ASA40069.1     | NCBI Protein | <i>Helicoverpa armigera</i>  |
| AFM93773.1     | NCBI Protein | <i>Helicoverpa armigera</i>  |
| QNS26346.1     | NCBI Protein | <i>Pieris rapae</i>          |
| QNS26342.1     | NCBI Protein | <i>Pieris rapae</i>          |
| QNS26350.1     | NCBI Protein | <i>Pieris rapae</i>          |
| QNS26349.1     | NCBI Protein | <i>Pieris rapae</i>          |
| QNS26348.1     | NCBI Protein | <i>Pieris rapae</i>          |
| QNS26347.1     | NCBI Protein | <i>Pieris rapae</i>          |
| QNS26345.1     | NCBI Protein | <i>Pieris rapae</i>          |
| QNS26344.1     | NCBI Protein | <i>Pieris rapae</i>          |
| QNS26341.1     | NCBI Protein | <i>Pieris rapae</i>          |
| XP_022117197.2 | NCBI Protein | <i>Pieris rapae</i>          |
| XP_045484521.1 | NCBI Protein | <i>Pieris rapae</i>          |
| XP_022116967.2 | NCBI Protein | <i>Pieris rapae</i>          |
| XP_022127768.2 | NCBI Protein | <i>Pieris rapae</i>          |
| XP_022127769.2 | NCBI Protein | <i>Pieris rapae</i>          |
| XP_022128532.2 | NCBI Protein | <i>Pieris rapae</i>          |
| XP_022124122.2 | NCBI Protein | <i>Pieris rapae</i>          |
| XP_022118428.2 | NCBI Protein | <i>Pieris rapae</i>          |
| XP_022118416.2 | NCBI Protein | <i>Pieris rapae</i>          |
| XP_022117531.2 | NCBI Protein | <i>Pieris rapae</i>          |
| AAR28762.1     | NCBI Protein | <i>Spodoptera frugiperda</i> |
| XP_035435754.2 | NCBI Protein | <i>Spodoptera frugiperda</i> |
| XP_035435244.1 | NCBI Protein | <i>Spodoptera frugiperda</i> |
| XP_035434733.1 | NCBI Protein | <i>Spodoptera frugiperda</i> |
| XP_035442487.1 | NCBI Protein | <i>Spodoptera frugiperda</i> |
| XP_050550076.1 | NCBI Protein | <i>Spodoptera frugiperda</i> |
| XP_035438141.2 | NCBI Protein | <i>Spodoptera frugiperda</i> |
| XP_035438137.2 | NCBI Protein | <i>Spodoptera frugiperda</i> |
| XP_035452971.2 | NCBI Protein | <i>Spodoptera frugiperda</i> |
| XP_035428835.1 | NCBI Protein | <i>Spodoptera frugiperda</i> |
| XP_035438151.1 | NCBI Protein | <i>Spodoptera frugiperda</i> |
| XP_035437860.1 | NCBI Protein | <i>Spodoptera frugiperda</i> |
| XP_035454669.1 | NCBI Protein | <i>Spodoptera frugiperda</i> |
| UYA18666.1     | NCBI Protein | <i>Spodoptera frugiperda</i> |
| UYA18664.1     | NCBI Protein | <i>Spodoptera frugiperda</i> |

---

**Table S2. Primers used in the RT-qPCR analysis.**

| Gene Name   | Primer sequence (5'-3')        |
|-------------|--------------------------------|
| TabsOBP01-F | CGTCTACTGCGTGCTGCTCAAG         |
| TabsOBP01-R | TCCATGCTAAGTCTTCAGGAGTGTCA     |
| TabsOBP02-F | GGCGTGGGATGTTCTGAGAGTTAA       |
| TabsOBP02-R | GTAGCATCTTATGTATCTCCAGCCAATCT  |
| TabsOBP03-F | AGGACGGCAAGTTCAAGAAGGATG       |
| TabsOBP03-R | TTGTTAGCAAGGCAAGAGTCAATCAG     |
| TabsOBP04-F | GTCTATCCGTGCGAAGAGGTTGTT       |
| TabsOBP04-R | TCTGTGCCGTAGTCAGCCTTGTA        |
| TabsOBP05-F | CCGACCGACTGGTTGTGGACTT         |
| TabsOBP05-R | TGAAGGCTGCGTTGAGGAAGGA         |
| TabsOBP06-F | CTTCAGTTCATTCGGTGCTTGGAGA      |
| TabsOBP06-R | CCTTACAGACAACGACGGAATTATCAGA   |
| TabsOBP07-F | GGCAGCACAACTCCGAAGAA           |
| TabsOBP07-R | CGCAGTACAAGATGAGAAATTAGCAGAC   |
| TabsOBP08-F | GCATCAGCAGCAGCATTCTTCAA        |
| TabsOBP08-R | GCAGCACTTCATTAAGCGGTATTCT      |
| TabsOBP09-F | TCGCCGCTGATATACCGCCTTA         |
| TabsOBP09-R | GACCTCTCGCCAACGCAATCTG         |
| TabsOBP10-F | GTCTAGTGTTCTAGCGTTCGTTCTG      |
| TabsOBP10-R | TTGCTTCCTTGAGGCATTCGTTGA       |
| TabsOBP11-F | GGTGCGTACATACACAGCGGAAT        |
| TabsOBP11-R | GCTTGAGTCTTACCAGTCTTCTTCTTACA  |
| TabsOBP12-F | TGTTGCTCGTGACCATTCTTGTGA       |
| TabsOBP12-R | GCATAAACTTCTTTGTTCGGTGTGTCT    |
| TabsOBP13-F | GAAGCATTGGAGGAATCAGACAAGGA     |
| TabsOBP13-R | TTCACCGTTGTTATCCGTCATCTCTG     |
| TabsOBP14-F | GGCTGCTTGATGGCGAACCA           |
| TabsOBP14-R | CATAGTGTGAGAAGAGTTGCGAACCT     |
| TabsOBP15-F | TGAAGTCCTACCTCACCAACGATGA      |
| TabsOBP15-R | GATTCCGATCCTGTTCCAGTTGTCTT     |
| TabsOBP16-F | ACTCCGCCTTATGCCTGACCAA         |
| TabsOBP16-R | ACTCATCCTCTCCATGCTGACACA       |
| TabsOBP17-F | AACGCATACGGAGGCAAGGAGA         |
| TabsOBP17-R | CCATCAGGCAGAACATATAGCACTTCA    |
| TabsOBP18-F | GACGGAGGAACAAGCGAGAGGT         |
| TabsOBP18-R | CCAGCACAGCCATGAAGTAGCC         |
| TabsOBP19-F | GCTTCACTACACAATCGGCGAACA       |
| TabsOBP19-R | GTCCACCATGCTCTCCAACACTTC       |
| TabsOBP20-F | GGTCACCGAAGCCAATAACAATCCAA     |
| TabsOBP20-R | TCTCCACTCTTACTAGAATTGCCATTACTG |
| TabsOBP21-F | TCCTGCTACTCTTCACCGTGCTT        |

|             |                                |
|-------------|--------------------------------|
| TabsOBP21-R | CGTACTGGCGGACGATCTTAGC         |
| TabsOBP22-F | CTTCAGGACAAGAGATTCATCCAGAGAC   |
| TabsOBP22-R | ATGTAGCCGAGCGTGCGTTG           |
| TabsOBP23-F | TTGTTCTGTATCGCTCTGGCTGTTG      |
| TabsOBP23-R | TGACCTTCTGCTTGTTGACCTTGAC      |
| TabsOBP24-F | GTTACCTCTGCCGACTTACTCACAA      |
| TabsOBP24-R | GAAGACGCACTGGACATCGTTACA       |
| TabsOBP25-F | CCTCCTGATATAACCGCCACAATGC      |
| TabsOBP25-R | ATGCTGATGCCGCTGCCTTG           |
| TabsOBP26-F | GGTGGTACTTGTCAACGCTGGAA        |
| TabsOBP26-R | TGCCTCGCCTGGATTGTTATGC         |
| TabsOBP27-F | GGCGGAGGTCCTTGATCCTATGA        |
| TabsOBP27-R | GCTTCTTGTCCATATCCACGCTGAT      |
| TabsOBP28-F | TTGGTTGGCATCGTTGGTTCTTCA       |
| TabsOBP28-R | ACTGGCATGGCGGTCTGGAA           |
| TabsOBP29-F | ACGGTGTCGCCAAGAATATAAGGAG      |
| TabsOBP29-R | CAGGTGATGTCCATAGTCGAGTGAAG     |
| TabsOBP30-F | CTATATTGCGGATCAGGAAGTCAGTAATCA |
| TabsOBP30-R | AAGAACCTATGCGTGTACTCGAAGATG    |
| TabsOBP31-F | GCCTTGGGAAAGTTGAAGTTGAGAAAG    |
| TabsOBP31-R | CAACCATATCTTGTCCGCCGATGT       |
| TabsOBP32-F | TGGTAAGGAATGCTAATGGCGAGAAC     |
| TabsOBP32-R | CTAACAGATAATACTTGGCTGGAGTGACA  |
| TabsOBP33-F | GCACCGTTAGAGGCATCAGGAATT       |
| TabsOBP33-R | CGTGGAACCTTG TAGTCCGTCTTCAA    |
| TabsOBP34-F | GAGAAGATACACTATGTCATCAGCAACCT  |
| TabsOBP34-R | GTAAGGAACGGCGTCGAAGAACTT       |
| TabsOBP35-F | CAAGTACACATTAGATTATGGCGACAGAG  |
| TabsOBP35-R | TTCCGAACTCCTCAGCGACAGT         |
| TabsOBP36-F | TTCGTCCAAGAGCCTGTCATATCG       |
| TabsOBP36-R | TCAATCAGCAAGGAAGAGTTCGTCAA     |
| TabsOBP37-F | AGATGGAACATTCACTGGATTGGATACG   |
| TabsOBP37-R | GTCACACTGTGCCTTACCGAACAA       |
| TabsOBP38-F | TGGACGGCAGGCTATTGTTTCATC       |
| TabsOBP38-R | TCACATCGTTGGCATTGCTCTTCA       |
| TabsOBP39-F | GAGGAGATGGTAAGCCGCACTG         |
| TabsOBP39-R | TCCGCCGAACAGGTTGGTCA           |
| TabsOBP40-F | TTCAGGAACACCGTCGTCACC          |
| TabsOBP40-R | TTAGGCTTCGCATTGTCCATCGT        |
| TabsOBP41-F | TATGCCGCCGTGGAGGTGATT          |
| TabsOBP41-R | CCTTGACAGTGGTCTTCTGAACTC       |
| TabsOBP42-F | ATACGACTACGAGACGAAGGAAGGT      |
| TabsOBP42-R | GCTGCTTGTTGCCTCCGAAGA          |
| TabsOBP43-F | GAACCTCTCCGACCATGTCATACG       |

|             |                                |
|-------------|--------------------------------|
| TabsOBP43-R | TATCCACCATCTTGCCTTCACATTTCAT   |
| TabsOBP44-F | TCGTGACGGAATGTATGATATGGACTG    |
| TabsOBP44-R | TCTATCCTATGAGAGTGATTACTGGCTACT |
| TabsOBP45-F | TGGAAGGATGGCTACGAGGTGAC        |
| TabsOBP45-R | GCAGGCTACCATCAGGAGATACCA       |
| TabsOBP46-F | GCCATCAAGTGTCTCAGCACCAA        |
| TabsOBP46-R | TCTCACAGCCGTGGATCAGGTC         |
| TabsOBP47-F | CGCCATCATCTGTATGTCCAATAAGTTC   |
| TabsOBP47-R | CAGGCAGACACCTTCACCACAC         |
| TabsOBP48-F | GCCATCATGTGTCTAAGCACCAAGT      |
| TabsOBP48-R | GCAACCATCTTCGTCATCAGGAGTC      |
| TabsOBP49-F | AACTGACTGAGGAGAAGATGGAGGAG     |
| TabsOBP49-R | CTATGTGAAGGATACGCCAGCAGTG      |
| TabsOBP50-F | AACTGACTGAGGAGAAGATGGAGGAG     |
| TabsOBP50-R | CTATGTGAAGGATACGCCAGCAGTG      |
| TabsOBP51-F | GAGAAGAAATGGGAGGACAGGATGG      |
| TabsOBP51-R | GCCTTGGTCTAGCATACTTGGA         |
| TabsOBP52-F | GACGGTCATCATCCAGGAGTCTGA       |
| TabsOBP52-R | AGTCGTTGAACACCTTAGCCTTCTTG     |
| TabsOBP53-F | CGAGACCTACACGAACCGCTACA        |
| TabsOBP53-R | GGTCGCACTTCGCACAGTTGTT         |
| TabsOBP54-F | GATGAATACACCGACAAGTACGACAAC    |
| TabsOBP54-R | GCACTTCTCGCAGTAGGTCTCC         |
| TabsOBP55-F | GAATCGTAGGTTATTGCTGCCGTATATCA  |
| TabsOBP55-R | CATTGACAGCCAGGAAGTCTTCGTAG     |
| TabsOBP56-F | AGCAGTGGTCGCCGATGAGAA          |
| TabsOBP56-R | TACGCCAGCAGGAGTCTCTTGTT        |
| TabsOBP57-F | ATATTGATAGACCAGAAGCACACTCCG    |
| TabsOBP57-R | GCGACGACTAAGCACAAGACAATA       |
| TabsOBP58-F | TGGAAGGAACTGTCGGCGAAGTA        |
| TabsOBP58-R | GTCTTGGCGGCTTGAATCCTGTC        |
| TabsOBP59-F | AGCGTAGCCACCATCGTCACA          |
| TabsOBP59-R | CATCATTGCTCTGATAACTTGTCGGATC   |
| TabsOBP60-F | TCCTACTCCAAGTGCCTACTCAACA      |
| TabsOBP60-R | AGCCAATCCTTAAACGCCTCCTG        |
| TabsOBP61-F | AGGAGTTGGTTGCTATGGACACTTG      |
| TabsOBP61-R | TCGTTCTGGATGATAGAGTCTGTATTGAAG |
| TabsOBP62-F | CTCAGATCATCGTCATATCAAGTTGCGTTA |
| TabsOBP62-R | AGTCTTCAAGGCTGTTCACTTCACC      |
| TabsOBP63-F | TATACCAACGACCGACTCCTCAA        |
| TabsOBP63-R | CTTCCTGATGTTGTTCTTCTGCTTGTC    |
| TabsOBP64-F | TCATTCAGAACAGGAGGCTACTAAGGA    |
| TabsOBP64-R | TTGCACAACCTCGTCTTGACTACTTCT    |
| TabsOBP65-F | GAAGCGGTGGTGAGCGACAA           |

|             |                                 |
|-------------|---------------------------------|
| TabsOBP65-R | TCAGGCGTTAGCAACAGCAGTT          |
| TabsOBP66-F | CTACGGACCACGATGACCTAGACA        |
| TabsOBP66-R | GCGAACGATTCAGGCAGGAACT          |
| TabsOBP67-F | CTATTCTGGTACTGTGCGTGTTGGT       |
| TabsOBP67-R | ACTGTCGTAGGCTGGGTTGTAGG         |
| TabsOBP68-F | ACAGACTACGACTACGGAGGATATGG      |
| TabsOBP68-R | GACGCTGGTGCTCTCATTGTAACT        |
| TabsOBP69-F | TCCGTCGTCTTCCTTACACTGCTA        |
| TabsOBP69-R | CTTGGCTATCATCACTTTCTGCTTGG      |
| TabsOBP70-F | TCCGTCGTCTTCCTTACACTGCTA        |
| TabsOBP70-R | CTTGGCTATCATCACTTTCTGCTTGG      |
| TabsOBP71-F | GATTCCAGACAATGAGACGGCTAAGT      |
| TabsOBP71-R | GTCAGGCACATGGTCAGCAAGG          |
| TabsOBP72-F | AAGTGTCTTCTTGCCGTGCGTGTT        |
| TabsOBP72-R | TCTCCGTCAGATACAGTCTCGTCATT      |
| TabsOBP73-F | TGCTTACCGAAGACAAATGTTGAGGA      |
| TabsOBP73-R | GCCGATTCATAGTTGAACTTGCCATT      |
| TabsOBP74-F | GTGATGAAGACCGTGGACCTGATG        |
| TabsOBP74-R | AAGAGTAGAACGCAGCTTCACAGAG       |
| TabsOBP75-F | AGATATGGTGAACAAGCAAGTGGACAT     |
| TabsOBP75-R | CAGCATAGAATACTCGGTCGCAGAAG      |
| TabsOBP76-F | AGAGAAAGGGCAGTTTGTCTGAAGAAA     |
| TabsOBP76-R | TTGCTGTCCAATAAGACGCCTCAC        |
| TabsOBP77-F | GCGGTGATGCCTTACATTGTGGAA        |
| TabsOBP77-R | TGCCTTCTGTGGAAGCGAGTGT          |
| TabsOBP78-F | TGCCGAATGCTTGTTCAAGAAGATTG      |
| TabsOBP78-R | CTCGCTCAAATCGTGGTCGTTCA         |
| TabsOBP79-F | ATTCCTGCGATACGGATTCCAATGTC      |
| TabsOBP79-R | AGCGGTTGTTCTTGAAGGCGATC         |
| TabsOBP80-F | CTCTACGGCTTTGTTCTGTTGTGTATTC    |
| TabsOBP80-R | AATCTTCTCCTTCTGTTCTGCTGTCATAG   |
| TabsOBP81-F | GCAAGCAATGTAGAGTCGCAGGAT        |
| TabsOBP81-R | TGACAGGTA CT TCTCACTTATCGCATA C |
| TabsOBP82-F | AGTGTCTACTTGCCTGTGCTTACAA       |
| TabsOBP82-R | TCACCGTCGCTTACTTCAACATCAT       |
| TabsOBP83-F | GCAAGCAATGTAGAGTCGCAGGAT        |
| TabsOBP83-R | TGACAGGTA CT TCTCACTTATCGCATA C |
| TabsOBP84-F | AGTGCGTCGTAAGAGCCAAGGT          |
| TabsOBP84-R | CTTCTATACATCTGTTGCCGTTGTTGATTC  |
| TabsOBP85-F | TGTTCTGTCGTGCTAGTCACAATCG       |
| TabsOBP85-R | TGTCCTCTGCTGAATTCTCTACCAT       |
| TabsOBP86-F | CATCTACGAGACGAACCACCTTACC       |
| TabsOBP86-R | GTGTCACCGCTGTCAGGAATCC          |
| TabsOBP87-F | GAACCAGCAAGTAGAACCATTTCAGAA     |



|                 |                               |
|-----------------|-------------------------------|
| TabsOBP87-R     | TGAGAACTTCGCTATCGTCTTCGTAG    |
| TabsOBP88-F     | GAAGAGTCCAAGCGATACACAGATATGAT |
| TabsOBP88-R     | TGAAGGTGATGGCATAACAGTTGAGTG   |
| TabsOBP89-F     | GACGGTCATCATCCAGGAGTCTGA      |
| TabsOBP89-R     | AGTCGTTGAACACCTTAGCCTTCTTG    |
| TabsOBP90-F     | GTCCGCAAGCTCAGCAGTGTT         |
| TabsOBP90-R     | TGTTCTCGTTCAAGCAATCGTTGTATG   |
| TabsOBP91-F     | CATCACTACCACCACCAGCACTG       |
| TabsOBP91-R     | CAATACACAGGCAATCAGACATTCTCC   |
| TabsOBP92-F     | GAGCCAGTAGTCAAGAACGGTCAA      |
| TabsOBP92-R     | TGAAGAGGTTGGTGAAGTAGAGGATGA   |
| TabsOBP93-F     | TCGCTCCAACCTTCACCAACCA        |
| TabsOBP93-R     | CGTACTCCGCCAGAATGTCTCCTT      |
| TabsOBP94-F     | GAGACGATAGCAGAATCCTTCAGCAA    |
| TabsOBP94-R     | GACCAGCCAGTGTAGCCAGTTG        |
| TabsOBP95-F     | TCACTCTCGTGGTATTCATCACTCTGT   |
| TabsOBP95-R     | TCTGCCTCCATCCGACTTAGTTCTT     |
| TabsOBP96-F     | ATTTTGACGCAACGAACAGA          |
| TabsOBP96-R     | AATACTACCATGAGGCACTCCA        |
| TabsOBP97-F     | ATGCGTGCCGTCCTGGTGTT          |
| TabsOBP97-R     | GCTGTGCTGTGATGAACTTCTTACTGT   |
| EF1 $\alpha$ -F | CCTGGGCACAGAGATTTTCAT         |
| EF1 $\alpha$ -R | GATCAGCTGCTTGACACCAA          |
| GAPDH-F         | GCGTCAACCTTGAAGCCTAC          |
| GAPDH-R         | TTACCAGAGGGACCGTCAAC          |

---

**Table S3. Developmental stage-specific expression profile of *TaOBPs* based on TPM value.**

| <b>Geneid</b>    | <b>Egg</b> | <b>L-1</b> | <b>L-2</b> | <b>L-3</b> | <b>L-4</b> | <b>Adult</b> |
|------------------|------------|------------|------------|------------|------------|--------------|
| <i>TabsOBP67</i> | 4.85906    | 3158.03    | 1945.63    | 2417.48    | 1110.05    | 2087.55      |
| <i>TabsOBP60</i> | 1.57693    | 424.185    | 175.511    | 275.607    | 249.841    | 2070.36      |
| <i>TabsOBP77</i> | 0.265322   | 125.855    | 44.5637    | 48.6623    | 36.9477    | 1380.25      |
| <i>TabsOBP54</i> | 229.343    | 2956.49    | 2303.15    | 2531.05    | 1275.85    | 1223.27      |
| <i>TabsOBP46</i> | 2.08637    | 0.49405    | 0.335451   | 0.218979   | 0.655127   | 1220.81      |
| <i>TabsOBP58</i> | 10.9814    | 27.483     | 20.52      | 17.0527    | 15.3439    | 1165.31      |
| <i>TabsOBP45</i> | 0.222577   | 0.249415   | 0          | 0.221993   | 0.398512   | 1084.82      |
| <i>TabsOBP12</i> | 0.465031   | 1.25213    | 0.240863   | 0.624206   | 0.748041   | 1024.85      |
| <i>TabsOBP89</i> | 0          | 0          | 0          | 0.339564   | 0          | 1013.41      |
| <i>TabsOBP55</i> | 0.613637   | 0.74345    | 0.647994   | 2.08243    | 2.24826    | 525.508      |
| <i>TabsOBP62</i> | 0.571484   | 2.13785    | 0.90066    | 1.93349    | 0.231877   | 509.153      |
| <i>TabsOBP32</i> | 0          | 7.07576    | 2.09167    | 4.84495    | 58.6878    | 491.55       |
| <i>TabsOBP59</i> | 3.36071    | 3.66247    | 9.25146    | 4.4351     | 4.43621    | 467.991      |
| <i>TabsOBP63</i> | 3.94282    | 45.2587    | 218.216    | 193.9      | 401.129    | 443.095      |
| <i>TabsOBP01</i> | 1.02921    | 0.254338   | 0.34998    | 5.02245    | 6.96705    | 384.517      |
| <i>TabsOBP43</i> | 0.104272   | 0          | 0.794688   | 0.207683   | 0.248495   | 362.934      |
| <i>TabsOBP25</i> | 0.347108   | 26.1184    | 14.4843    | 1.03443    | 7.11404    | 357.348      |
| <i>TabsOBP28</i> | 7.77461    | 6.99085    | 1.43493    | 0.681951   | 0.376174   | 326.363      |
| <i>TabsOBP76</i> | 0.494383   | 2.89429    | 1.19434    | 0.508298   | 0.610177   | 323.002      |
| <i>TabsOBP94</i> | 74.2223    | 17.9591    | 22.1345    | 33.0722    | 19.0871    | 295.784      |
| <i>TabsOBP29</i> | 0.0988533  | 375.83     | 182.793    | 162.928    | 165.567    | 253.895      |
| <i>TabsOBP80</i> | 1.77212    | 513.091    | 149.645    | 69.5572    | 25.1863    | 243.905      |
| <i>TabsOBP56</i> | 3.89937    | 703.456    | 1059.75    | 798.322    | 401.135    | 215.395      |
| <i>TabsOBP17</i> | 0.117607   | 0          | 0.540544   | 0.822263   | 0.984257   | 205.363      |
| <i>TabsOBP91</i> | 0.629922   | 0.321492   | 0.284008   | 0.248808   | 0          | 182.954      |
| <i>TabsOBP48</i> | 0.439236   | 0.247025   | 0.167725   | 0.328469   | 0          | 178.66       |
| <i>TabsOBP13</i> | 103.819    | 0.756174   | 6.64034    | 18.2546    | 15.6167    | 177.12       |
| <i>TabsOBP24</i> | 9.75578    | 0.875307   | 6.02749    | 106.149    | 278.319    | 173.233      |
| <i>TabsOBP74</i> | 0.383853   | 0          | 0.655704   | 0          | 0          | 166.852      |
| <i>TabsOBP47</i> | 0.23192    | 9.76118    | 11.1855    | 3.82082    | 1.66296    | 148.959      |
| <i>TabsOBP03</i> | 1.45722    | 769.721    | 523.111    | 168.85     | 127.468    | 144.529      |
| <i>TabsOBP85</i> | 1.77111    | 0.320825   | 0.501613   | 0.162332   | 0.389072   | 140.372      |
| <i>TabsOBP65</i> | 3092.04    | 733.688    | 1410.86    | 3890.6     | 5408.39    | 108.069      |
| <i>TabsOBP97</i> | 89.6123    | 22.31      | 27.5942    | 33.3594    | 41.0775    | 102.993      |
| <i>TabsOBP95</i> | 0          | 10.7694    | 11.273     | 6.69366    | 3.69966    | 95.4088      |
| <i>TabsOBP37</i> | 0.267976   | 633.592    | 374.271    | 199.857    | 118.136    | 93.616       |
| <i>TabsOBP22</i> | 2.81592    | 17.24      | 107.427    | 52.8748    | 21.2764    | 88.5342      |
| <i>TabsOBP26</i> | 4.62641    | 514.536    | 402.066    | 410.433    | 85.3414    | 83.004       |
| <i>TabsOBP53</i> | 3155.08    | 2.3669     | 3.98775    | 2.32199    | 1.95061    | 77.1849      |
| <i>TabsOBP09</i> | 0.0512675  | 19.7698    | 34.0505    | 7.97615    | 3.25776    | 54.2497      |

|                  |           |          |           |           |           |          |
|------------------|-----------|----------|-----------|-----------|-----------|----------|
| <i>TabsOBP40</i> | 1.01831   | 826.749  | 752.074   | 522.533   | 177.835   | 52.6333  |
| <i>TabsOBP73</i> | 0.866903  | 3.29016  | 2.83455   | 1.65661   | 0         | 46.8209  |
| <i>TabsOBP11</i> | 0         | 0        | 0         | 0         | 0         | 43.7508  |
| <i>TabsOBP41</i> | 545.552   | 1.01735  | 0.501399  | 0.439755  | 4.53303   | 41.378   |
| <i>TabsOBP82</i> | 0         | 83.9634  | 20.2338   | 9.88329   | 4.41908   | 39.1279  |
| <i>TabsOBP23</i> | 70.5839   | 62.948   | 107.38    | 169.618   | 159.313   | 35.6215  |
| <i>TabsOBP05</i> | 0.244215  | 20.1419  | 122.415   | 39.4155   | 8.96033   | 31.5232  |
| <i>TabsOBP15</i> | 0.589603  | 19.7215  | 42.6682   | 21.2771   | 9.24546   | 30.9792  |
| <i>TabsOBP64</i> | 0.494383  | 18.1927  | 26.6737   | 19.8236   | 7.9323    | 28.4434  |
| <i>TabsOBP10</i> | 0.0509512 | 7.5433   | 7.69734   | 1.95651   | 12.1103   | 27.4935  |
| <i>TabsOBP57</i> | 1.74544   | 825.365  | 1028.63   | 956.115   | 970.016   | 27.3795  |
| <i>TabsOBP06</i> | 0         | 1.62491  | 6.82544   | 1.16109   | 0.844606  | 25.9824  |
| <i>TabsOBP49</i> | 0         | 0        | 0         | 0.105198  | 0         | 23.6584  |
| <i>TabsOBP84</i> | 0.0573121 | 2.08166  | 3.6953    | 4.3517    | 5.13333   | 23.3886  |
| <i>TabsOBP52</i> | 3.76342   | 0.259459 | 0.720725  | 0.352398  | 0.421824  | 22.4032  |
| <i>TabsOBP61</i> | 2.09715   | 5.28031  | 7.98773   | 3.41999   | 2.82095   | 20.4148  |
| <i>TabsOBP02</i> | 0         | 0.342119 | 2.2369    | 0.180438  | 0         | 18.1414  |
| <i>TabsOBP87</i> | 0.0660116 | 0.166995 | 0         | 0         | 0         | 17.4378  |
| <i>TabsOBP27</i> | 0.657808  | 3.08043  | 16.875    | 3.00927   | 2.67986   | 17.4002  |
| <i>TabsOBP35</i> | 5.26775   | 37.222   | 146.638   | 110.675   | 71.9691   | 16.9911  |
| <i>TabsOBP14</i> | 0.0644659 | 0        | 0         | 0.0636791 | 0         | 14.6275  |
| <i>TabsOBP44</i> | 0         | 0        | 0         | 0.0691518 | 0         | 14.5522  |
| <i>TabsOBP81</i> | 0         | 14.8361  | 6.65314   | 1.75725   | 0.485768  | 13.7021  |
| <i>TabsOBP36</i> | 0.161836  | 75.1985  | 177.964   | 93.4938   | 52.2809   | 13.3906  |
| <i>TabsOBP88</i> | 0         | 0        | 0         | 0         | 0         | 11.8886  |
| <i>TabsOBP21</i> | 254.088   | 24.9978  | 36.7997   | 16.3928   | 10.6544   | 11.8154  |
| <i>TabsOBP66</i> | 4.07618   | 1.26063  | 45.2725   | 534.318   | 836.229   | 9.63997  |
| <i>TabsOBP31</i> | 0.0982672 | 0.130606 | 0.587514  | 0.967139  | 254.597   | 9.28752  |
| <i>TabsOBP04</i> | 0.197707  | 63.6666  | 23.7173   | 21.6005   | 21.1609   | 9.22229  |
| <i>TabsOBP18</i> | 1.97516   | 12.5437  | 32.0436   | 7.50528   | 2.65214   | 7.9255   |
| <i>TabsOBP50</i> | 0.933231  | 0        | 0         | 0         | 0         | 7.9103   |
| <i>TabsOBP16</i> | 23.1083   | 16.8534  | 14.677    | 10.6069   | 4.49389   | 7.02915  |
| <i>TabsOBP42</i> | 1.35775   | 0.101335 | 0.654865  | 0.216054  | 3.78518   | 6.92374  |
| <i>TabsOBP68</i> | 0.509512  | 2.55933  | 0.914536  | 0.451502  | 0.65947   | 5.51166  |
| <i>TabsOBP08</i> | 0.211638  | 29.3422  | 71.8316   | 19.4925   | 8.5958    | 4.73002  |
| <i>TabsOBP90</i> | 0         | 0        | 0         | 0         | 0         | 3.04944  |
| <i>TabsOBP78</i> | 0.146791  | 20.2358  | 4.54692   | 1.91765   | 0.707053  | 2.92335  |
| <i>TabsOBP92</i> | 0.206351  | 1.22512  | 8.33536   | 3.70848   | 3.27839   | 2.10329  |
| <i>TabsOBP71</i> | 0.14176   | 22.0261  | 1.00154   | 1.6805    | 0         | 1.86025  |
| <i>TabsOBP19</i> | 0.839476  | 1.12418  | 27.5067   | 0.871604  | 0.274057  | 1.70826  |
| <i>TabsOBP20</i> | 0.0278029 | 7.02898  | 1.68926   | 0.490065  | 0.162567  | 1.25747  |
| <i>TabsOBP83</i> | 0.149426  | 5.50094  | 3.24343   | 0.450742  | 0         | 1.15103  |
| <i>TabsOBP07</i> | 0.0474412 | 0        | 0         | 0.140016  | 0         | 1.14009  |
| <i>TabsOBP51</i> | 0.0827862 | 0.300851 | 0.0611684 | 0.10117   | 0.0241581 | 0.849772 |

|                  |           |          |          |          |          |           |
|------------------|-----------|----------|----------|----------|----------|-----------|
| <i>TabsOBP93</i> | 0.063475  | 0.32351  | 0.286246 | 0.250743 | 0.149851 | 0.826304  |
| <i>TabsOBP30</i> | 0         | 0.229774 | 0.252425 | 23.4206  | 30.5643  | 0.636849  |
| <i>TabsOBP34</i> | 0.0509512 | 14.009   | 18.5956  | 17.5082  | 14.6282  | 0.583588  |
| <i>TabsOBP75</i> | 0.247192  | 42.5874  | 16.3227  | 6.35372  | 0.915266 | 0.482092  |
| <i>TabsOBP86</i> | 0.132661  | 8.18338  | 0.817682 | 0.9307   | 0.477772 | 0.394807  |
| <i>TabsOBP39</i> | 0.161836  | 39.7195  | 30.1318  | 21.8985  | 315.591  | 0.34512   |
| <i>TabsOBP38</i> | 0.550234  | 61.6538  | 148.626  | 88.4452  | 75.3107  | 0.21162   |
| <i>TabsOBP70</i> | 0         | 0        | 4.92922  | 110.819  | 190.65   | 0.201035  |
| <i>TabsOBP69</i> | 0         | 0        | 0        | 0        | 0        | 0.201035  |
| <i>TabsOBP72</i> | 0         | 7.90876  | 2.5056   | 1.0348   | 1.22743  | 0.113202  |
| <i>TabsOBP96</i> | 0         | 0        | 0.1351   | 0        | 0        | 0.111818  |
| <i>TabsOBP33</i> | 0.0485559 | 31.6774  | 27.137   | 105.98   | 370.382  | 0.0615362 |
| <i>TabsOBP79</i> | 0         | 0        | 0.355095 | 0        | 107.122  | 0         |

---
